# Supplementary material
Source: publisher site journal article supplement (https://www.dovepress.com/article/265404)
Supplement: Supplementary file 1 [file get_supplementary_file.php]

Supplemental Tables

Supplemental Table 1. *International Classification of Disease* (ICD) codes and SNOMED codes defining IBD.

|  | **ICD-10** | **SNOMED codes*** |
| --- | --- | --- |
|  | **1997-** | **1965-** |
| UC | K51 | D6255 or M41, M42, M43, M44, or M47 |
| CD | K50 | D6216 or M41, M42, M43, M44, M463, or M47 |
| IBD-U | UC + CD, or K52.3 | D6214 or M41, M42, M43, M44, M463, or M47 |

*SNOMED codes starting with “M” (inflammation suggestive of IBD, but not a specified subtype) were required to be accompanied by a topographic code of T67 or T68 (colon). M41 means all codes starting with “M41” etc. D codes are diagnostic codes but listed under morphology in pathology registers.

Abbreviations: IBD, inflammatory bowel disease; CD, Crohn’s disease; IBD-U, IBD unclassified; UC, Ulcerative colitis.

**Supplemental Table 2**. Topography SNOMED codes and the corresponding location descriptions in SWIBREG. The full 6-digit code represents data in ESPRESSO.

| **SNOMED code** | **Location** | **Location captured in SWIBREG** |
| --- | --- | --- |
| T65000 | Jejunum-ileum | Jejunum-ileum |
| T67000  T67100  T67200  T67300  T67400  T67500  T67600  T67700 | Colon  Cecum  Ascending colon  Hepatic flexure  Transverse colon  Splenic flexure  Descending colon  Sigmoid colon | Colon |
| T68000 | Rectum | Rectum |

Abbreviations: SWIBREG, Swedish Quality Register for Inflammatory Bowel Disease; ESPRESSO, Epidemiology Strengthened by histoPathology Reports in Sweden.

**Supplemental Table 3**. Morphology SNOMED codes in ESPRESSO by description and clinician-defined severity.

| **SNOMED code** | **Morphology** | **Clinician defined severity*** |
| --- | --- | --- |
| M00100  M00110 | Normal  Normal | Normal |
| M40000  M40400  M41000  M42100  M43000  M43030 | Unspecified inflammation  Pustulous inflammation, unspecified  Acute inflammation  Acute and chronic inflammation  Chronic inflammation  Ulcer, chronic inflammation | Unspecified Inflammation |
| M42000 | Subacute inflammation | Mild inflammation |
| M40460  M40700  M41700  M41740  M44000  M44700  M44900  M45020 | Inflammation with pus  Inflammation with necrosis  Inflammation with necrosis, abscess  Abscess  Granulomatous inflammation  Necrotizing granulomatous inflammation  Necrotizing fibrinous inflammation  Inflammation with granulation | Severe inflammation |
| None of the above |  | Other |

*According to Swedish gastroenterologists.

If multiple codes were present, the highest degree of inflammation was assumed.

Abbreviations: ESPRESSO, Epidemiology Strengthened by histoPathology Reports in Sweden.

**Supplemental Table 4.** Mayo endoscopic subscore for UC and an endoscopic SWIBREG-CD score for CD based on coding in SWIBREG.

| **Endoscopic Score** | **UC and IBD-U**40  **Mayo endoscopic subscore** | **CD***21,29  **SWIBREG-CD score** |
| --- | --- | --- |
| 0 | Normal mucosa or inactive disease | Normal mucosa or inactive disease |
| 1 | Mild activity (erythema, decreased vascular pattern, mild friability) | Aphthous ulcerations <5mm on normal mucosa or mild activity (mild erythema, decreased vascular pattern, granularity) |
| 2 | Moderate activity (marked erythema, lack of vascular pattern, friability, erosions) | Edematous mucosa, marked erythema, absent vascular pattern, friability, and **without** ulceration ≥5mm |
| 3 | Severe activity (spontaneous bleeding, large ulcerations) | Edematous mucosa, marked erythema, absent vascular pattern, friability, and  **with** ulceration ≥5mm |

Abbreviations: CD, Crohn’s disease; IBD-U, IBD unclassified; UC, Ulcerative colitis; SWIBREG, Swedish Quality Register for Inflammatory Bowel Disease; Mayo endoscopic subscore (MES); SWIBREG-CD score (SCS).

* This score is based on earlier work of Froslie et al. in the IBSEN cohort21,29and Ludvigsson et al. in the SWIBREG cohort.27

**Supplemental Figure.** Linkage of Swedish registries for the development of study cohorts.

**Algorithm**. Algorithm for calculating histology score and predicted Mayo endoscopic subscore or SWIBREG-CD subscore class.

**Input:** IBD subtype and, from a given histopathology record, topography (TOPO) code with one or more corresponding morphology (MORPHO) code(s).

**Step 1:** Go to the column corresponding to the IBD subtype.

**Step 2: Compute** Scores 1, 2, 3, and 4 by following the rule list in the corresponding cell

**Note:** Normal codes are any code that starts with M00. “Only normal code” means that all of the MORPHO codes start with M00

| **Output** | **UC** | **CD** | **IBD-U** |
| --- | --- | --- | --- |
| **Score 1** | **If** TOPO is T65 (jejunum/ileum) and M44200 (Non-necrotizing granuloma) absent **then** score = 0.946  **else** **If** M42100 (acute and chronic inflammation) present and M76800 (polyp) absent **then** score = 0.139  **else** **If** only normal code present **then** score = 0.796  **else** **If** M09450 (absence of malignancy) present and M38000 (ulcer) absent **then** score = 0.608  **else** **If** M09350 (“morphologic description only/free text”) absent and M72040 (polypoid hyperplasia) present **then** score = 0.803  **else** **If** D62140 (IBD-U) absent and D62550 (UC) absent **then** score = 0.327  **else** (default rule) **then** score = 0.208 | **If** M42100 (acute and chronic inflammation) present **then** score = 0.177  **else** **If** M69700 (atypia) absent and M72040 (polypoid hyperplasia) present **then** score = 0.780  **else** **If** only normal code present **then** score = 0.814  **else** **If** TOPO **not** T68 (rectum) and M72200 (lymphoid hyperplasia) absent **then** score = 0.307  **else** (default rule) **then** score = 0.558 | **If** only normal code absent and M47170 (lymphoid infiltrate) absent **then** score = 0.302  **else** **If** TOPO is T65 (jejunum/ileum) **then** score = 0.924  **else** (default rule) **then** score = 0.665 |
| **Score 2** | **If** M40000 (unspecified inflammation) present **then** score = 0.405  **else** **If** TOPO is T65 (jejunum/ileum) **then** score = 0.030  **else** **If** only.normal.code absent and M72040 (polypoid hyperplasia) absent **then** score = 0.294  **else** (default rule) **then** score = 0.131 | **If** only.normal.code absent **then** score = 0.286  **else** (default rule) **then** score = 0.120 | **If** TOPO is T65 (jejunum/ileum) and only.normal.code present **then** score = 0.046  **else** (default rule) **then** score = 0.251 |
| **Score 3** | **If** TOPO is T65 (jejunum/ileum) and M82630 (tubulovillous adenoma) absent **then** score = 0.013  **else** **If** M42100 (acute and chronic inflammation) present **then** score = 0.475  **else** **If** D62140 (IBD-U) absent and M72040 (polypoid hyperplasia) present **then** score = 0.014  **else** **If** only.normal.code absent and M09450 (absence of malignancy) absent **then** score = 0.325  **else** (default rule) **then** score = 0.070 | **If** D62550 (UC) present **then** score = 0.483  **else** **If** only.normal.code absent and M72040 (polypoid hyperplasia) absent **then** score = 0.241  **else** (default rule) **then** score = 0.053 | **If** M00110 (normal) present and M42100 (acute and chronic inflammation) absent **then** score = 0.043  **else** **If** TOPO not T65 (jejunum/ileum) **then** score = 0.338  **else** (default rule) **then** score = 0.120 |
| **Score 4** | **If** only.normal.code present **then** score = 0.012  **else** **If** M43030 (ulcer, chronic inflammation) present **then** score = 0.448  **else** (default rule) **then** score = 0.091 | **If** M00110 (normal) present **then** score = 0.019  **else** **If** M38000 (ulcer) absent and MX0000 (clot) absent **then** score = 0.118  **else** (default rule) **then** score = 0.515 | **If** only.normal.code present **then** score = 0.003  **else** (default rule) **then** score = 0.120 |

**Output:** You end up with 4 numeric scores (Score 1, Score 2, Score 3, Score 4).

**To calculate the numeric histology score:** Take each numeric score value, multiply it by the score number, take the sum of the result, and subtract 1 from that. Histology score = (1 * (Score 1) + 2 * (Score 2) + 3 * (Score 3) + 4 * (Score 4)) – 1

**To calculate the predicted category:** Find the score with the largest numeric value, take the number of the score and subtract 1 from the result. For example, if the Score 3 is the largest value, the predicted MES/SCS is 2.

**Example calculation:**

Input: IBD-type = UC, TOPO = T65 (jejunum/ileum), MORPHO = [M42199 (acute and chronic inflammation); M82630 (tubulovillous adenoma)].

Step 1: Go to UC column.

Score 1 = 0.139 (first condition)

Score 2 = 0.030 (first condition)

Score 3 = 0.475 (second condition)

Score 4 = 0.091 (default rule)

Numeric score = 1 * 0.139 + 2 * 0.030 + 3 * 0.475 + 4 * 0.091 - 1 = 0.988. This is larger than the “high histology” cutoff for UC of 0.77.

Predicted MES = 2 (Score 3 is the largest).

This would be done for each of the TOPO codes available on that date. The histology score is defined as the maximum score of any TOPO code over the locations for that date.
